# Supplementary material
Source: PubMed Central journal article supplement (PMC5714455)
Supplement: 1387FileS1.pdf [file 1387FileS1.pdf]

# Substrate specificity of the FurE transporter is determined by cytoplasmic terminal domain interactions

Georgia F. Papadaki, Sotiris Amillis, and George Diallinas

## Supplemental Material

**Table S1.** Oligonucleotides used in this study.

| Oligonucleotide     | 5'-3' Sequence                                |
|---------------------|-----------------------------------------------|
| GFP NotI R          | CGCGCGGCCGCTTACTTGTACAGCTCGTCC                |
| GFP PstI R          | AACTGCAGTTACTTGTACAGCTCGTCCATGC               |
| FurD SpeI F         | GCGACTAGTATGCGTTTCGGTCGCTTTCACC               |
| FurA SpeI F         | GCGACTAGTATGTCAGCTATTAAACGATGGATC             |
| FurC SpeI F         | GCGACTAGTATGGACCGCCTCTCCATCAG                 |
| FurE SpeI F         | GCGACTAGTATGGGACTACGAGAAAGACTCC               |
| FurA K534 NS NotI R | GCGGCGGCCGCGCCGGTGTGGATATCTTCCG               |
| FurD K531 NS NotI R | GCGGCGGCCGCGCTCTCCCCCAACTCCTCCC               |
| FurE K498 NS NotI R | GCGGCGGCCGCTCTTCAACATCAAACGGCCAG              |
| gpdA (1000) AatII F | GCGGACGTCGGTTGACCGGTGCCTGGATC                 |
| YFPn XbaI F2        | CGCGTCTAGAATGGTGAGCAAGGGCGAGGAGCTG            |
| YFPn SpeI R         | CGCGACTAGTTTACATGATATAGACGTTGTGGCTGTTG        |
| YFPc BamHI F        | CGCGGGATCCATGGCCGACAAGCAGAAGAAC               |
| YFPc NS BamHI R     | CGCGGGATCCCTTGTACAGCTCGTCCATG                 |
| YFPn BamHI F        | CGCGGGATCCATGGTGAGCAAGGGCGAGGAGCTG            |
| YFPn NS BamHI R     | CGCGGGATCCCATGATATAGACGTTGTGGCTGTTG           |
| FurD BglII F        | GCCGAGATCTATGCGTTTCGGTCGCTTTCACC              |
| FurD XbaI NS R      | GCGCTCTAGATAAACAGCAAAACCTTCTCC                |
| FurE BamHI F        | GCCGGGATCCATGGGACTACGAGAAAGACTCC              |
| FurE XbaI NS R      | GCGCTCTAGAGCAGAGACAGCCTCCTTCTTCTGCACC         |
| FurEN21 SpeI F      | CGCGACTAGTATGGCCTCCAACAAAGACCTCG              |
| GFP NotI dstr F     | GACGAGCTGTACAAGTAAGCGAACGCGATCCACTTAACGTTACTG |
| GFP NotI dstr R     | CAGTAACGTTAAGTGGATCGCGTTCGCTTACTTGTACAGCTCGTC |
| FurE K498 XbaI R    | GCGTCTAGACTACTCTTCAACATCAAACGGCCAGAC          |
| gpdA NotI F         | GCGGCGGCCGCGCATGCCATTAACCTAGGTACAGAAGTCC      |
| FurE Y392N F        | GCTTTTCATCTTTTCTAGGTGGGAACAGCCTGTTTCTTGGTGC   |
| FurE Y392N R        | GCACCAAGAAACAGGCTGTTCCACCTAGAAAAGATGAAAAGC    |
| FurE T133V F        | CGCTATTATCTGGTTTGGCGTGCAGACGTACCAGGCCG        |
| FurE T133V R        | CGGCCTGGTACGTCTGCACGCCAAACCAGATAATAGCG        |
| FurE seq 1          | CGCCGTCTTCGGTATGCTTCC                         |
| FurE seq 2          | CGCGGTACGCCAAACTCCCAG                         |

TMS12

|      |                    |                                                         |                        |            |     |
|------|--------------------|---------------------------------------------------------|------------------------|------------|-----|
|      | AGAVGRDVPVGAQYIYNV | NYLSGFIVSFVMYFIITRLCPAATSDTWNEVNTDLELDTEGHDAEDIHTG      | KPIGFETSEPREY          | KGAKAGSASV | 557 |
| FurA | SNSVNSRIQVGVIHPYQF | GWLLGFVGTSLVYIALSYGFPVREALIERAVLSDEVYEGREVEGVEEGREELGES | KREGVG                 | KKGFAVYV   |     |
| FurD | AAVTGQDGVKGANLYSC  | SWLVSIVVSGMVYYLLFFVWPFDEEK                              | VIVLEGMEEGDRVVRVEEAVVQ | KKEAVSA    | 544 |
| FurE |                    |                                                         |                        |            |     |

FurE  
ΔC498
FurA  
ΔC534
FurD  
ΔC531

**Figure S1.** Alignment of the C-terminal regions of FurA, FurD and FurE transporters. Positions of truncations and potential ubiquitin acceptor Lys residues are highlighted. The last transmembrane domain, TMS12, is also highlighted.

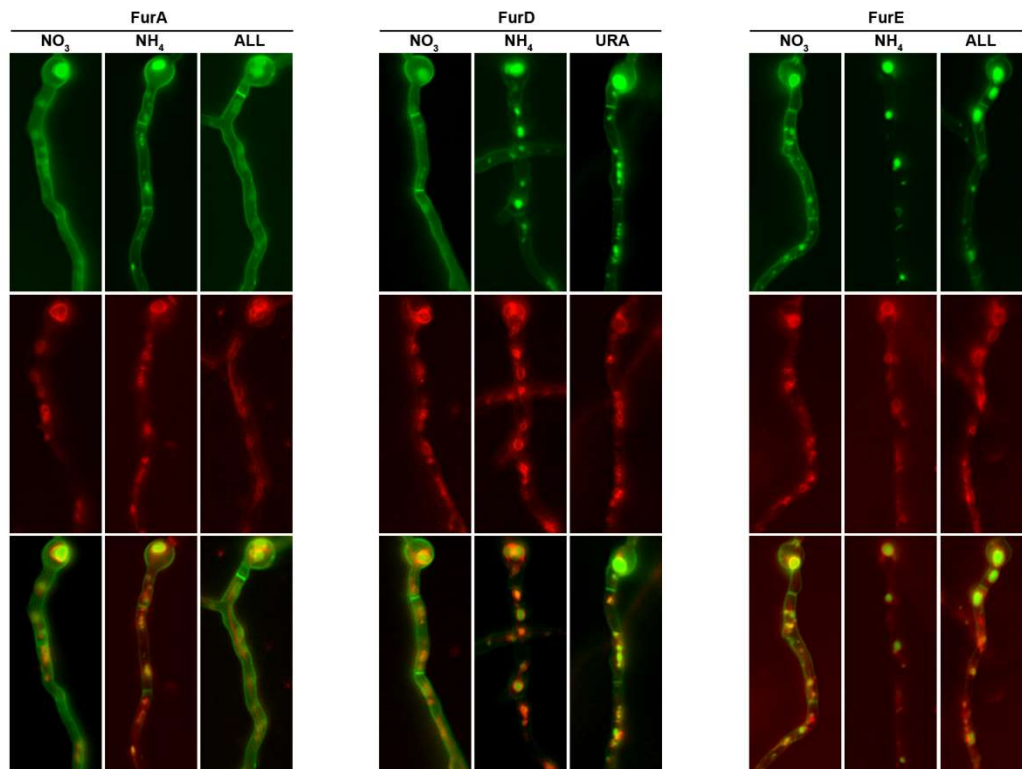

**Figure S2.** Epifluorescence microscopy showing the nearly absolute co-localization of GFP fluorescent signal, coming from degradation of the Fur-GFP chimaeras, with the endosome/vacuole-specific FM4-64 molecular stain. Conditions for strain growth and microscopic analysis are as described in Materials and methods. Conditions for vacuolar staining with FM4-64 are as described in Martzoukou *et al.* 2017.

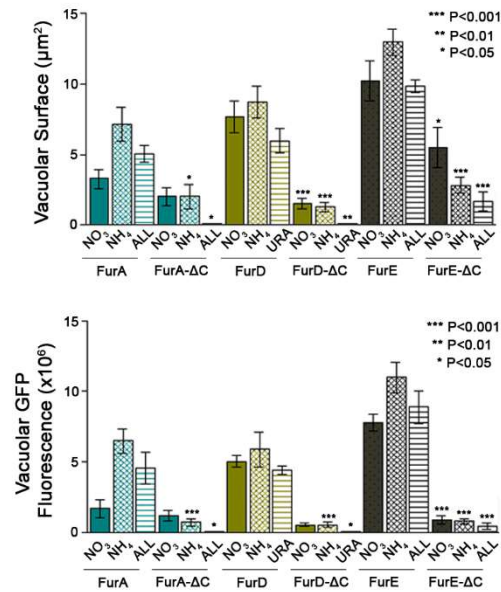

**Figure S3.** Quantification and statistical analyses of endocytosis, as measured by estimating the surface and intensity of vacuolar GFP fluorescence. Standard deviation is depicted with error bars (n=5) (see Materials and Methods).

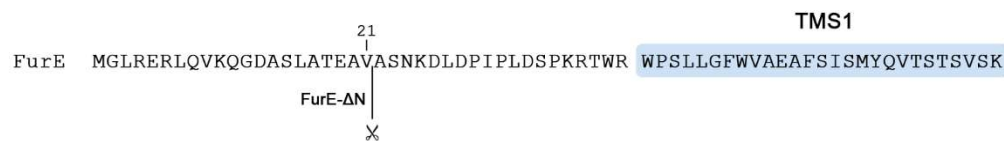

**Figure S4.** N-terminal region of FurE showing the truncated segment in FurE-ΔN. The first transmembrane domain, TMS1, is also highlighted.

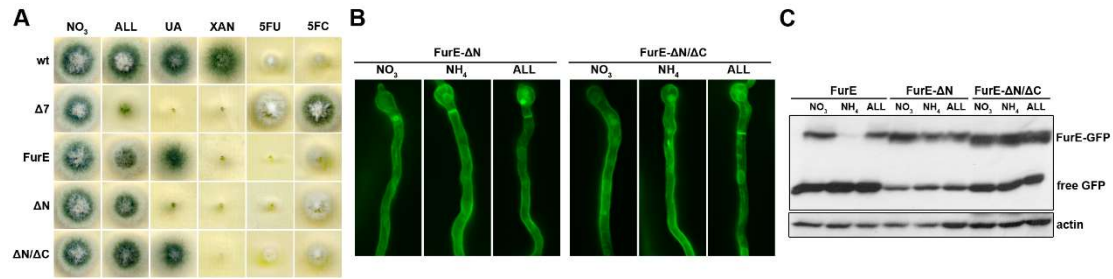

**Figure S5.** Functional analysis of doubly truncated FurE-ΔN/ΔC. **(A)** Growth tests of mutants and control strains (WT, Δ7, FurE and ΔN) in MM containing nitrate (control), uric acid (UA), allantoin (ALL) or xanthine (Xan) as N sources, or on nitrate media containing 5-fluorouracil (5FU) or 5-fluorocytosine (5FC). All growth tests shown were performed at 37°C. **(B)** Subcellular localization of FurE-ΔN and FurE-ΔN/ΔC mutants analyzed by *in vivo* epifluorescence microscopy. **(C)** Protein steady state levels of FurE, FurE-ΔN and FurE-ΔN/ΔC, detected by western blot analysis using anti-GFP (upper panel) or anti-actin (control, lower panel) antibodies, as described in Materials and methods (the blot concerning FurE is the same as that shown in Figure 3D, left panel).
